# Supplementary material
Source: publisher site journal article supplement (https://www.dovepress.com/article/424359)
Supplement: Supplementary file 1 [file get_supplementary_file.php]

Supplementary Table 1. Detailed information of 50 target genes.

| ID                 | Class          |
|--------------------|----------------|
| ECE1               | protein_coding |
| SPRN               | protein_coding |
| FAM219A            | protein_coding |
| ZFP92              | protein_coding |
| hsa_circRNA_402458 | circRNA        |
| SOD3               | protein_coding |
| Clorf226           | protein_coding |
| hsa_circRNA_103410 | circRNA        |
| ANKFY1             | protein_coding |
| MYCBP2             | protein_coding |
| CRTC1              | protein_coding |
| DNM1               | protein_coding |
| CLEC2L             | protein_coding |
| STK32B             | protein_coding |
| MXD4               | protein_coding |
| EDC3               | protein_coding |
| ADAMTSL2           | protein_coding |
| PLXNA1             | protein_coding |
| HAMP               | protein_coding |
| NDUFB10            | protein_coding |
| NMB                | protein_coding |
| KCNH6              | protein_coding |
| TMEM120B           | protein_coding |
| CATG00000022074.1  | protein_coding |
| PRELP              | protein_coding |
| ADI1               | protein_coding |
| NDOR1              | protein_coding |
| SPEM2              | protein_coding |
| SLC2A3             | protein_coding |
| LENG8              | protein_coding |
| TTL                | protein_coding |
| ICOSLG             | protein_coding |
| CATG00000041077.1  | protein_coding |
| KCNK5              | protein_coding |
| TPSD1              | protein_coding |
| TLL1               | protein_coding |
| HSD3B2             | protein_coding |
| SEPT4              | protein_coding |
| TSPYL2             | protein_coding |
| CELSR3             | protein_coding |
| CATG00000052071.1  | protein_coding |
| TEX14              | protein_coding |
| NECTIN1            | protein_coding |
| hsa_circRNA_092022 | circRNA        |
| TMEM129            | protein_coding |
| ZNF71              | protein_coding |
| CATG00000061202.1  | protein_coding |

|                    |                |
|--------------------|----------------|
| CATG0000005517.1   | protein_coding |
| ORAI2              | protein_coding |
| NFRKB              | protein_coding |
| PPP1R26            | protein_coding |
| ZNF446             | protein_coding |
| DENND6B            | protein_coding |
| SGF29              | protein_coding |
| MMP15              | protein_coding |
| BFSP2              | protein_coding |
| HOXC13             | protein_coding |
| OSCAR              | protein_coding |
| ADGB               | protein_coding |
| hsa_circRNA_105039 | circRNA        |
| OR4D5              | protein_coding |
| ETFRF1             | protein_coding |
| TBX6               | protein_coding |
| OSTC               | protein_coding |
| UMOD               | protein_coding |
| SPTB               | protein_coding |
| KMT2D              | protein_coding |
| OR1L8              | protein_coding |
| PPP1R12B           | protein_coding |
| SLC29A4            | protein_coding |
| BPIFB1             | protein_coding |
| EPHA10             | protein_coding |
| NUCB1              | protein_coding |
| CCDC190            | protein_coding |
| ADAD2              | protein_coding |
| PCOLCE2            | protein_coding |
| KRT80              | protein_coding |
| RER1               | protein_coding |
| MT3                | protein_coding |
| METTL7B            | protein_coding |
| GATAD2A            | protein_coding |
| DERA               | protein_coding |
| CRISPLD2           | protein_coding |
| TMEM63B            | protein_coding |
| PTDSS2             | protein_coding |
| P4HTM              | protein_coding |
| ZNF845             | protein_coding |
| CRKL               | protein_coding |
| CATG0000005832.1   | protein_coding |
| ARHGAP4            | protein_coding |
| CYB561             | protein_coding |
| OVCH2              | protein_coding |
| FUT11              | protein_coding |
| MRPL9              | protein_coding |
| TMEM191B           | protein_coding |
| LZTS1              | protein_coding |
| RAD23A             | protein_coding |
| HSP90AB1           | protein_coding |

|                    |                |
|--------------------|----------------|
| CATG00000049832.1  | protein_coding |
| CSNK1G2            | protein_coding |
| GABRA3             | protein_coding |
| CLSTN2             | protein_coding |
| BARHL1             | protein_coding |
| CDC25B             | protein_coding |
| NOTUM              | protein_coding |
| FAM102A            | protein_coding |
| WBP2               | protein_coding |
| CD7                | protein_coding |
| BBS1               | protein_coding |
| CATG00000072731.1  | protein_coding |
| SCN4B              | protein_coding |
| hsa_circRNA_067161 | circRNA        |
| CCDC3              | protein_coding |
| CATG00000013852.1  | protein_coding |
| GRIN2B             | protein_coding |
| GATSL2             | protein_coding |
| NRXN3              | protein_coding |
| METTL26            | protein_coding |
| METAP1D            | protein_coding |
| AAK1               | protein_coding |
| PGLYRP3            | protein_coding |
| CNN1               | protein_coding |
| CARTPT             | protein_coding |
| TMEM234            | protein_coding |
| RAI1               | protein_coding |
| TSPAN14            | protein_coding |
| CATG00000033628.1  | protein_coding |
| STAP2              | protein_coding |
| SMIM1              | protein_coding |
| DLGAP3             | protein_coding |
| MLKL               | protein_coding |
| B3GNT4             | protein_coding |
| TRAF1              | protein_coding |
| UGT2B7             | protein_coding |
| SYT6               | protein_coding |
| RFXANK             | protein_coding |
| ABHD4              | protein_coding |
| CCDC106            | protein_coding |
| ADCYAP1R1          | protein_coding |
| TARM1              | protein_coding |
| ZBTB20             | protein_coding |
| HEMK1              | protein_coding |
| RIPK3              | protein_coding |
| ARHGAP27           | protein_coding |
| KRTAP10-9          | protein_coding |
| KHSRP              | protein_coding |
| CAMK2G             | protein_coding |
| TRAF5              | protein_coding |
| KIR3DL2            | protein_coding |

|                   |                |
|-------------------|----------------|
| CTXN1             | protein_coding |
| TRPM5             | protein_coding |
| CARNS1            | protein_coding |
| KRTAP10-2         | protein_coding |
| CEP85             | protein_coding |
| ONECUT3           | protein_coding |
| CCL24             | protein_coding |
| KSR2              | protein_coding |
| PEPD              | protein_coding |
| COMT              | protein_coding |
| SLURP1            | protein_coding |
| BAP1              | protein_coding |
| JMJD4             | protein_coding |
| EFNB3             | protein_coding |
| KYAT3             | protein_coding |
| TPGS1             | protein_coding |
| ABR               | protein_coding |
| FAM78A            | protein_coding |
| NSFL1C            | protein_coding |
| ZNF445            | protein_coding |
| CLRN3             | protein_coding |
| NECAB3            | protein_coding |
| BCL7C             | protein_coding |
| TMEM63C           | protein_coding |
| CTD-307407.11     | protein_coding |
| NCKAP5L           | protein_coding |
| FGF17             | protein_coding |
| CBX6              | protein_coding |
| FGD2              | protein_coding |
| VOPP1             | protein_coding |
| TMEM63A           | protein_coding |
| CATG00000047365.1 | protein_coding |
| CATG00000034862.1 | protein_coding |
| TMEM136           | protein_coding |
| VEGF              | protein_coding |
| HECTD4            | protein_coding |
| MTSS1L            | protein_coding |
| TMEM191C          | protein_coding |
| ZNF317            | protein_coding |
| PROC              | protein_coding |
| IQSEC2            | protein_coding |
| SPATA33           | protein_coding |
| TAB1              | protein_coding |
| CATG00000027025.1 | protein_coding |
| MCM7              | protein_coding |
| CATG00000048956.1 | protein_coding |
| SCUBE1            | protein_coding |
| TXNL4B            | protein_coding |
| CABP7             | protein_coding |
| PLEKHG4           | protein_coding |
| hsa-miR-6501-3p   | miRNA          |

|                   |       |
|-------------------|-------|
| hsa-miR-7108-3p   | miRNA |
| hsa-miR-1199-5p   | miRNA |
| hsa-miR-185-3p    | miRNA |
| hsa-miR-6827-3p   | miRNA |
| hsa-miR-6744-3p   | miRNA |
| hsa-miR-665       | miRNA |
| hsa-miR-637       | miRNA |
| hsa-miR-1538      | miRNA |
| hsa-miR-4738-5p   | miRNA |
| hsa-miR-3649      | miRNA |
| hsa-miR-1250-5p   | miRNA |
| hsa-miR-761       | miRNA |
| hsa-miR-3064-5p   | miRNA |
| hsa-miR-490-5p    | miRNA |
| hsa-miR-3622a-5p  | miRNA |
| hsa-miR-4728-5p   | miRNA |
| hsa-miR-323b-5p   | miRNA |
| hsa-miR-608       | miRNA |
| hsa-miR-5591-5p   | miRNA |
| hsa-miR-4296      | miRNA |
| hsa-miR-3180-5p   | miRNA |
| hsa-miR-1233-5p   | miRNA |
| hsa-miR-4674      | miRNA |
| hsa-miR-4730      | miRNA |
| hsa-miR-1262      | miRNA |
| hsa-miR-2115-5p   | miRNA |
| hsa-miR-1323      | miRNA |
| hsa-miR-6084      | miRNA |
| hsa-miR-6077      | miRNA |
| hsa-miR-4471      | miRNA |
| hsa-miR-8069      | miRNA |
| hsa-miR-1287-5p   | miRNA |
| hsa-miR-4283      | miRNA |
| hsa-miR-103a-2-5p | miRNA |
| hsa-miR-6877-5p   | miRNA |
| hsa-miR-1273g-3p  | miRNA |
| hsa-miR-4253      | miRNA |
| hsa-miR-1226-3p   | miRNA |
| hsa-miR-6740-3p   | miRNA |
| hsa-miR-3614-5p   | miRNA |
| hsa-miR-4269      | miRNA |
| hsa-miR-5196-3p   | miRNA |
| hsa-miR-4468      | miRNA |
| hsa-miR-3681-3p   | miRNA |
| hsa-miR-4797-5p   | miRNA |
| hsa-miR-615-5p    | miRNA |
| hsa-miR-18b-5p    | miRNA |
| hsa-miR-6501-5p   | miRNA |
| hsa-miR-3943      | miRNA |
| hsa-miR-1270      | miRNA |
| hsa-miR-6773-3p   | miRNA |

|                  |       |
|------------------|-------|
| hsa-miR-378c     | miRNA |
| hsa-miR-128-2-5p | miRNA |
| hsa-miR-216a-3p  | miRNA |
| hsa-miR-4665-5p  | miRNA |
| hsa-miR-10b-5p   | miRNA |
| hsa-miR-2110     | miRNA |
| hsa-miR-1237-5p  | miRNA |
| hsa-miR-328-5p   | miRNA |
| hsa-miR-6788-3p  | miRNA |
| hsa-miR-3972     | miRNA |
| hsa-miR-378e     | miRNA |
| hsa-miR-6752-5p  | miRNA |
| hsa-miR-4303     | miRNA |
| hsa-miR-198      | miRNA |
| hsa-miR-8058     | miRNA |
| hsa-miR-10a-5p   | miRNA |
| hsa-miR-3907     | miRNA |
| hsa-miR-4488     | miRNA |
| hsa-miR-6742-5p  | miRNA |
| hsa-miR-541-3p   | miRNA |
| hsa-miR-532-3p   | miRNA |
| hsa-miR-3156-5p  | miRNA |
| hsa-miR-762      | miRNA |
| hsa-miR-636      | miRNA |
| hsa-miR-4254     | miRNA |
| hsa-miR-4707-3p  | miRNA |
| hsa-miR-6881-3p  | miRNA |
| hsa-miR-890      | miRNA |
| hsa-miR-1247-5p  | miRNA |
| hsa-miR-6858-5p  | miRNA |
| hsa-miR-5193     | miRNA |
| hsa-miR-4690-3p  | miRNA |
| hsa-miR-4669     | miRNA |
| hsa-miR-25-5p    | miRNA |
| hsa-miR-4300     | miRNA |
| hsa-miR-378d     | miRNA |
| hsa-miR-6765-5p  | miRNA |
| hsa-miR-424-5p   | miRNA |
| hsa-miR-3196     | miRNA |
| hsa-miR-920      | miRNA |
| hsa-miR-422a     | miRNA |
| hsa-miR-5092     | miRNA |
| hsa-miR-6889-5p  | miRNA |
| hsa-miR-4663     | miRNA |
| hsa-miR-4763-5p  | miRNA |
| hsa-miR-6842-3p  | miRNA |
| hsa-miR-3620-3p  | miRNA |
| hsa-miR-4265     | miRNA |
| hsa-miR-6867-3p  | miRNA |
| hsa-miR-4697-5p  | miRNA |
| hsa-miR-4518     | miRNA |

|                 |       |
|-----------------|-------|
| hsa-miR-3154    | miRNA |
| hsa-miR-6836-3p | miRNA |
| hsa-miR-6767-3p | miRNA |
| hsa-miR-1255a   | miRNA |
| hsa-miR-6504-5p | miRNA |
| hsa-miR-378h    | miRNA |
| hsa-miR-6085    | miRNA |
| hsa-miR-378a-3p | miRNA |
| hsa-miR-1471    | miRNA |
| hsa-miR-634     | miRNA |
| hsa-miR-210-5p  | miRNA |
| hsa-miR-4322    | miRNA |
| hsa-miR-4675    | miRNA |
| hsa-miR-4423-5p | miRNA |
| hsa-miR-3663-5p | miRNA |
| hsa-miR-5009-5p | miRNA |
| hsa-miR-410-5p  | miRNA |
| hsa-miR-3191-3p | miRNA |
| hsa-miR-4436a   | miRNA |
| hsa-miR-6726-5p | miRNA |
| hsa-miR-4634    | miRNA |
| hsa-miR-451b    | miRNA |
| hsa-miR-3197    | miRNA |
| hsa-miR-4525    | miRNA |
| hsa-miR-5001-5p | miRNA |
| hsa-miR-3619-5p | miRNA |
| hsa-miR-7113-5p | miRNA |
| hsa-miR-128-3p  | miRNA |
| hsa-miR-3689d   | miRNA |
| hsa-miR-8068    | miRNA |
| hsa-miR-4430    | miRNA |
| hsa-miR-340-3p  | miRNA |
| hsa-miR-3065-3p | miRNA |
| hsa-miR-3175    | miRNA |
| hsa-miR-6829-3p | miRNA |
| hsa-miR-4632-3p | miRNA |
| hsa-miR-943     | miRNA |
| hsa-miR-1227-5p | miRNA |
| hsa-miR-2277-5p | miRNA |
| hsa-miR-6784-5p | miRNA |
| hsa-miR-4476    | miRNA |
| hsa-miR-4498    | miRNA |
| hsa-miR-4298    | miRNA |
| hsa-miR-6757-5p | miRNA |
| hsa-miR-6838-5p | miRNA |
| hsa-miR-323a-5p | miRNA |
| hsa-miR-383-3p  | miRNA |
| hsa-miR-4731-5p | miRNA |
| hsa-miR-3180-3p | miRNA |
| hsa-miR-6758-5p | miRNA |
| hsa-miR-191-3p  | miRNA |

|                  |       |
|------------------|-------|
| hsa-miR-5008-5p  | miRNA |
| hsa-miR-3186-3p  | miRNA |
| hsa-miR-6799-5p  | miRNA |
| hsa-miR-6879-3p  | miRNA |
| hsa-miR-5000-3p  | miRNA |
| hsa-miR-6787-3p  | miRNA |
| hsa-miR-128-1-5p | miRNA |
| hsa-miR-6843-3p  | miRNA |
| hsa-miR-4505     | miRNA |
| hsa-miR-92a-2-5p | miRNA |
| hsa-miR-5706     | miRNA |
| hsa-miR-6813-5p  | miRNA |
| hsa-miR-1273f    | miRNA |
| hsa-miR-4755-3p  | miRNA |
| hsa-miR-4746-3p  | miRNA |
| hsa-miR-4741     | miRNA |
| hsa-miR-5787     | miRNA |
| hsa-miR-4435     | miRNA |
| hsa-miR-6751-5p  | miRNA |
| hsa-miR-6840-3p  | miRNA |
| hsa-miR-6764-5p  | miRNA |
| hsa-miR-6072     | miRNA |
| hsa-miR-6079     | miRNA |
| hsa-miR-6842-5p  | miRNA |
| hsa-miR-6807-5p  | miRNA |
| hsa-miR-4417     | miRNA |
| hsa-miR-1207-5p  | miRNA |
| hsa-miR-4713-5p  | miRNA |
| hsa-miR-3189-3p  | miRNA |
| hsa-miR-4532     | miRNA |
| hsa-miR-3607-5p  | miRNA |
| hsa-miR-4311     | miRNA |
| hsa-miR-6869-3p  | miRNA |
| hsa-miR-4747-3p  | miRNA |
| hsa-miR-1304-5p  | miRNA |
| hsa-miR-657      | miRNA |
| hsa-miR-4689     | miRNA |
| hsa-miR-6856-5p  | miRNA |
| hsa-miR-18a-3p   | miRNA |
| hsa-miR-3605-5p  | miRNA |
| hsa-miR-6510-5p  | miRNA |
| hsa-miR-378b     | miRNA |
| hsa-miR-1245b-3p | miRNA |
| hsa-miR-339-3p   | miRNA |
| hsa-miR-7109-5p  | miRNA |
| hsa-miR-6749-3p  | miRNA |
| hsa-miR-6728-3p  | miRNA |
| hsa-miR-3936     | miRNA |
| hsa-miR-6857-5p  | miRNA |
| hsa-miR-4308     | miRNA |
| hsa-miR-4701-3p  | miRNA |



|                  |       |
|------------------|-------|
| hsa-miR-6871-3p  | miRNA |
| hsa-miR-6803-5p  | miRNA |
| hsa-miR-3135b    | miRNA |
| hsa-miR-371a-3p  | miRNA |
| hsa-miR-6731-5p  | miRNA |
| hsa-miR-6131     | miRNA |
| hsa-miR-6820-3p  | miRNA |
| hsa-miR-4687-3p  | miRNA |
| hsa-miR-1203     | miRNA |
| hsa-miR-6791-3p  | miRNA |
| hsa-miR-6776-5p  | miRNA |
| hsa-miR-4799-3p  | miRNA |
| hsa-miR-4745-3p  | miRNA |
| hsa-miR-1587     | miRNA |
| hsa-miR-4787-5p  | miRNA |
| hsa-miR-6816-5p  | miRNA |
| hsa-miR-6736-5p  | miRNA |
| hsa-miR-6806-5p  | miRNA |
| hsa-miR-764      | miRNA |
| hsa-miR-6862-5p  | miRNA |
| hsa-miR-211-3p   | miRNA |
| hsa-miR-654-5p   | miRNA |
| hsa-miR-8052     | miRNA |
| hsa-miR-412-3p   | miRNA |
| hsa-miR-4763-3p  | miRNA |
| hsa-miR-518d-3p  | miRNA |
| hsa-miR-6765-3p  | miRNA |
| hsa-miR-6815-5p  | miRNA |
| hsa-miR-874-3p   | miRNA |
| hsa-miR-6165     | miRNA |
| hsa-miR-4783-3p  | miRNA |
| hsa-miR-331-3p   | miRNA |
| hsa-miR-4449     | miRNA |
| hsa-miR-520a-5p  | miRNA |
| hsa-miR-3180     | miRNA |
| hsa-miR-6865-5p  | miRNA |
| hsa-miR-6746-3p  | miRNA |
| hsa-miR-151a-5p  | miRNA |
| hsa-miR-6720-3p  | miRNA |
| hsa-miR-378g     | miRNA |
| hsa-miR-6891-3p  | miRNA |
| hsa-miR-1193     | miRNA |
| hsa-miR-521      | miRNA |
| hsa-miR-6894-3p  | miRNA |
| hsa-miR-4530     | miRNA |
| hsa-miR-1178-5p  | miRNA |
| hsa-miR-6786-5p  | miRNA |
| hsa-miR-6715b-5p | miRNA |
| hsa-miR-6877-3p  | miRNA |
| hsa-miR-5010-5p  | miRNA |
| hsa-miR-4717-5p  | miRNA |

|                  |       |
|------------------|-------|
| hsa-miR-4711-3p  | miRNA |
| hsa-miR-148a-3p  | miRNA |
| hsa-miR-7978     | miRNA |
| hsa-miR-4733-3p  | miRNA |
| hsa-miR-3151-5p  | miRNA |
| hsa-miR-4671-3p  | miRNA |
| hsa-miR-7845-5p  | miRNA |
| hsa-miR-6851-3p  | miRNA |
| hsa-miR-564      | miRNA |
| hsa-miR-1307-3p  | miRNA |
| hsa-miR-4757-5p  | miRNA |
| hsa-miR-6851-5p  | miRNA |
| hsa-miR-4492     | miRNA |
| hsa-miR-7156-3p  | miRNA |
| hsa-miR-5685     | miRNA |
| hsa-miR-6717-5p  | miRNA |
| hsa-miR-212-5p   | miRNA |
| hsa-miR-6878-3p  | miRNA |
| hsa-miR-338-3p   | miRNA |
| hsa-miR-6775-5p  | miRNA |
| hsa-miR-15a-3p   | miRNA |
| hsa-miR-2392     | miRNA |
| hsa-miR-4670-5p  | miRNA |
| hsa-miR-6827-5p  | miRNA |
| hsa-miR-1265     | miRNA |
| hsa-miR-378f     | miRNA |
| hsa-miR-5572     | miRNA |
| hsa-miR-7113-3p  | miRNA |
| hsa-miR-4740-3p  | miRNA |
| hsa-miR-3675-5p  | miRNA |
| hsa-miR-518b     | miRNA |
| hsa-miR-1255b-5p | miRNA |
| hsa-miR-3622b-5p | miRNA |
| hsa-miR-6777-5p  | miRNA |
| hsa-miR-1236-3p  | miRNA |
| hsa-miR-6848-5p  | miRNA |
| hsa-miR-660-3p   | miRNA |
| hsa-miR-214-3p   | miRNA |
| hsa-miR-432-5p   | miRNA |
| hsa-miR-1202     | miRNA |
| hsa-miR-3190-5p  | miRNA |
| hsa-miR-3663-3p  | miRNA |
| hsa-miR-1908-3p  | miRNA |
| hsa-miR-6811-3p  | miRNA |
| hsa-miR-4485-5p  | miRNA |
| hsa-miR-513c-5p  | miRNA |
| hsa-miR-6846-5p  | miRNA |
| hsa-miR-6769a-3p | miRNA |
| hsa-miR-494-5p   | miRNA |
| hsa-miR-3620-5p  | miRNA |
| hsa-miR-21-3p    | miRNA |

|                 |       |
|-----------------|-------|
| hsa-miR-3926    | miRNA |
| hsa-miR-188-3p  | miRNA |
| hsa-miR-2355-5p | miRNA |
| hsa-miR-4252    | miRNA |
| hsa-miR-3652    | miRNA |
| hsa-miR-7854-3p | miRNA |
| hsa-miR-6500-5p | miRNA |
| hsa-miR-5589-5p | miRNA |
| hsa-miR-1178-3p | miRNA |
| hsa-miR-3692-5p | miRNA |
| hsa-miR-6774-5p | miRNA |
| hsa-miR-6754-3p | miRNA |
| hsa-miR-22-3p   | miRNA |
| hsa-miR-6801-5p | miRNA |
| hsa-miR-1205    | miRNA |
| hsa-miR-1302    | miRNA |
| hsa-miR-5187-5p | miRNA |
| hsa-miR-4753-5p | miRNA |
| hsa-miR-6743-3p | miRNA |
| hsa-miR-635     | miRNA |
| hsa-miR-3147    | miRNA |
| hsa-miR-6885-5p | miRNA |
| hsa-miR-503-5p  | miRNA |
| hsa-miR-5090    | miRNA |
| hsa-miR-1225-3p | miRNA |
| hsa-miR-3179    | miRNA |
| hsa-miR-512-5p  | miRNA |
| hsa-miR-744-3p  | miRNA |
| hsa-miR-4764-5p | miRNA |
| hsa-miR-6789-3p | miRNA |
| hsa-miR-152-3p  | miRNA |
| hsa-miR-8059    | miRNA |
| hsa-miR-6850-3p | miRNA |
| hsa-miR-3177-3p | miRNA |

---
